# Supplementary material for: A protein-based pneumococcal vaccine elicits broad immunity associated with multifunctional antibody responses in humans
Source: JCI journal article supplement (doi:10.1172/jci196261), 2026-02-01
Supplement: sd1 [file 1]

1        **Novel protein-based pneumococcal vaccine elicits**  
2        **broad immunity through IgG subclass dominance and**  
3        **multifunctional antibody responses**

4        **Author**

5        Kaiyi Li<sup>1,2</sup>, Jinglu Yang<sup>1,2</sup>, Xiaobing Zhai<sup>1</sup>, Jinbo Gou<sup>3</sup>, Xiuwen Sui<sup>3</sup>, Bochao  
6        Wei<sup>3</sup>, Yuan Wang<sup>4</sup>, Xiaoling Su<sup>2</sup>, Xiaoyun Yang<sup>2</sup>, Shiqin Jin<sup>1</sup>, Xuan Zhou<sup>1</sup>,  
7        Yuxuan Zhang<sup>1</sup>, Tao Zhu<sup>3</sup>, Junxiang Wang<sup>1</sup>, Zhongfang Wang<sup>1,2,5</sup>

8

9        **Affiliations**

10        <sup>1</sup>State Key Laboratory of Respiratory Disease & National Clinical Research  
11        Center for Respiratory Disease, Guangzhou Institute of Respiratory Health, the  
12        First Affiliated Hospital of Guangzhou Medical University, Guangzhou Medical  
13        University, Guangzhou, China.

14        <sup>2</sup>Guangzhou National Laboratory, Guangzhou, Guangdong, China.

15        <sup>3</sup>CanSino Biologics Inc., Rongsheng Building, No. 185 South Street, West Area  
16        of Dongli Economic and Technological Development Zone, Tianjin, China.

17        <sup>4</sup>Key Laboratory of Emergency and Trauma of Ministry of Education,  
18        Engineering Research Center for Hainan Biological Sample Resources of  
19        Major Diseases, The Hainan Branch of National Clinical Research Center for  
20        Cancer, the First Clinical College & the First Affiliated Hospital, Hainan Medical  
21        University, Haikou 570102.

22        <sup>5</sup>Shenzhen Hetao Institute of Guangzhou National Laboratory, Guangzhou,

23 Guangdong, China.

24 K. L., J.Y. and X.Z. contributed equally to this work

25 Address correspondence to: Tao Zhu, No. 185 South Street, West District,

26 Tianjin Economic-Technological Development Area, Tianjin, China. Phone:400-

27 922-2099; tao.zhu@cansinotech.com; Junxiang Wang, No. 151 Yanjiang Road,

28 Yuexiu District, Guangzhou, Guangdong Province, China. Phone:15626211053;

29 Email: 120298127@qq.com; Zhongfang Wang, No. 96 Xingdao Huanbei Road,

30 Guangzhou International Bio-Island, Huangpu District, Guangzhou,

31 Guangdong Province, China. Phone: 13929521227; Email:

32 wangzhongfang@gird.cn

33 Conflict of interest: We declare that we do not have any commercial or

34 associative interests that represent a conflict of interest in connection with the

35 submitted work. Members of CanSino Biologics Inc. in the author list provided

36 substantial support for sample provision, experimental testing, and other

37 related aspects, and they have no financial or other relevant conflicts of interest

38 with this manuscript.

39

40 This Supplementary material contains:

41 Supplemental Figure 1 to 9.

42

43

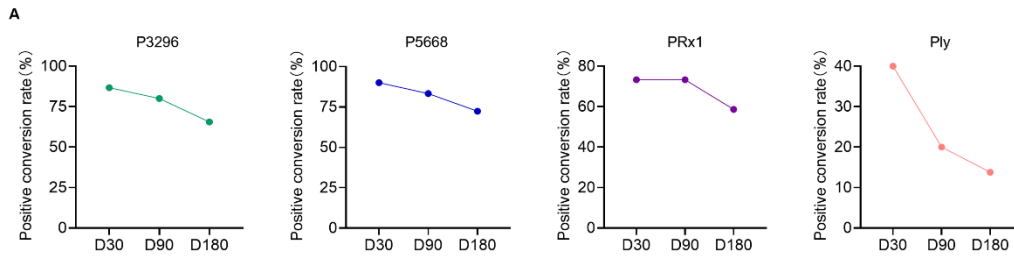

44

45 **Supplemental Figure 1. The positive conversion rate in the PBPV group.**

46 **(A)** Positive conversion rates for P3296, P5668, PRx1, and Ply were assessed  
 47 at D30, D90, and D180, positive response defined as a  $\geq 4$ -fold increase in  
 48 antibody titers compared to D0 levels.

49

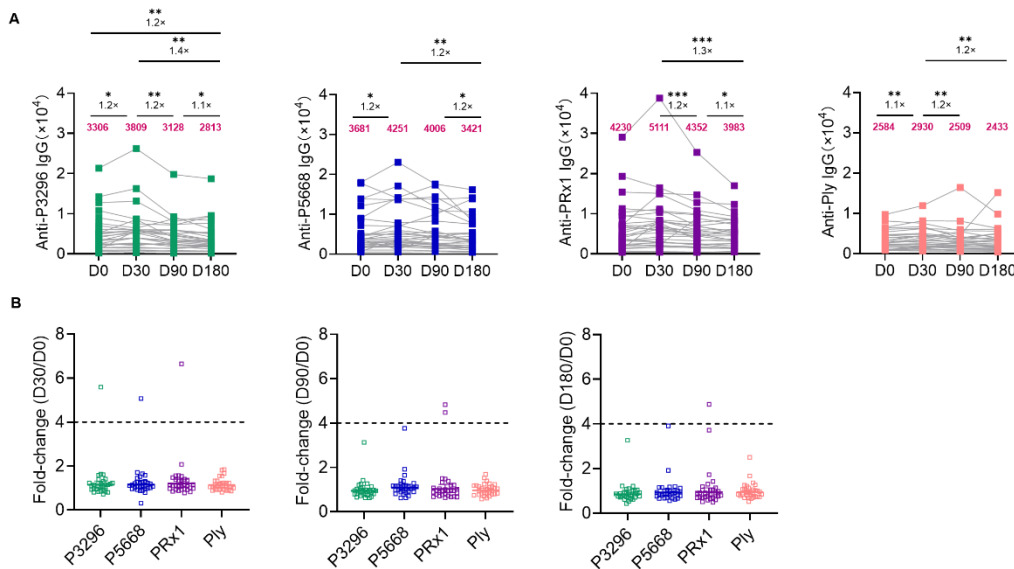

50

51 **Supplemental Figure 2. PPV23 fails to induce the effective P3296-, P5668-,**

52 **PRx1- and Ply-specific antibody production. (A)** Specific antibody titers

53 against P3296 (green), P5668 (blue), PRx1 (purple), and Ply (pink) were

54 measured in the PPV23 group (n = 30) at D0, D30, D90 and D180. **(B)** Fold

55 changes for P3296, P5668, PRx1, and Ply were assessed at D30, D90 and

56 D180, defined a  $\geq 4$ -fold increase in antibody titers compared to D0 levels as  
 57 positive cutoff. The error bars defined geometric mean with 95% CI. The  
 58 numbers in magenta indicated the geometric mean titers (GMT) in **A**.  
 59 Significance was measured using the Wilcoxon rank-sum test in **A**. All p-values  
 60 were adjusted for multiple testing using the Benjamini–Hochberg (BH) method.  
 61 \* $p < 0.05$ , \*\* $p < 0.01$ , \*\*\* $p < 0.001$ .

62

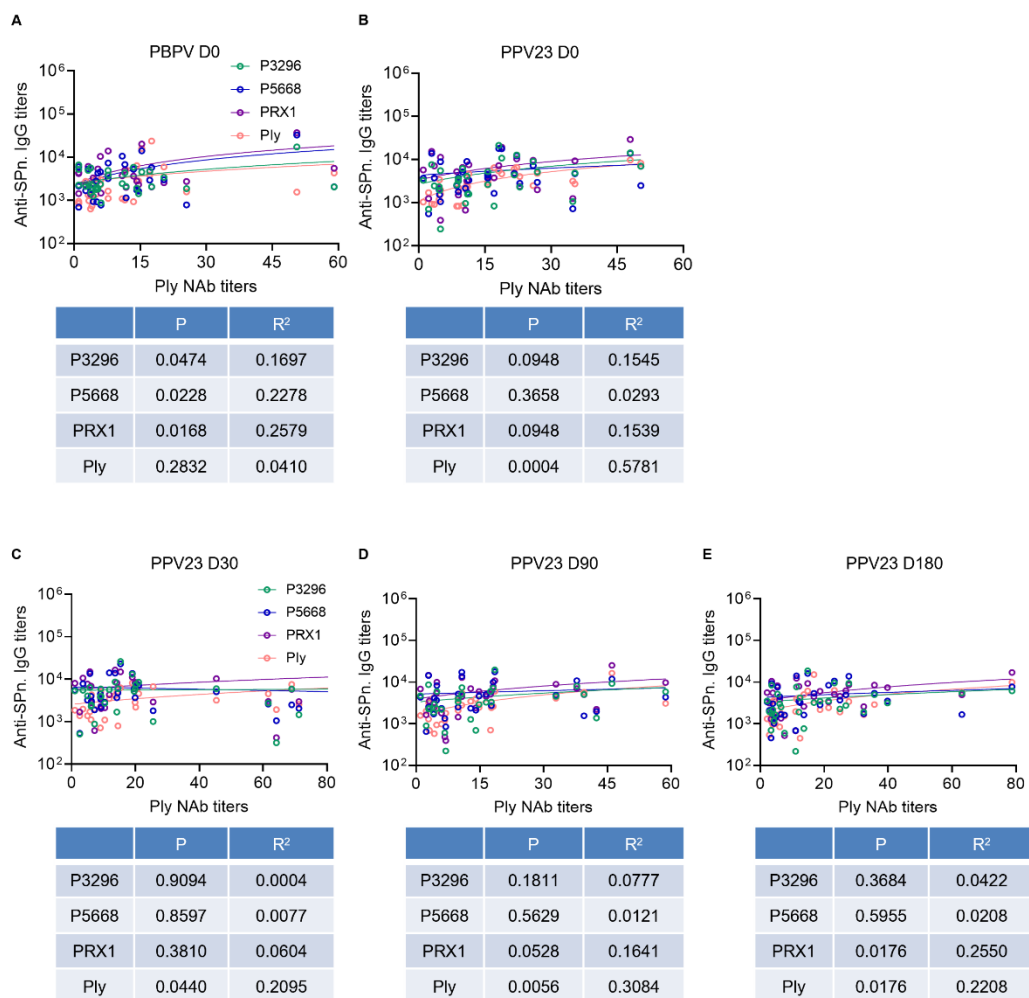

63

64 **Supplemental Figure 3. Correlation analysis between titers of four**  
 65 **protein-specific antibodies and Ply-neutralizing antibody titers induced**

66 **by PPV23. (A-E)** Correlation analysis between specific antibody titers of the  
 67 four PBPV immunogens (P3296, P5668, PRx1 and Ply) and neutralizing  
 68 antibody titers against Ply in the PBPV group at D0 and in the PPV23 group at  
 69 D0, D30, D90, D180. All p-values were adjusted for multiple testing using the  
 70 Benjamini–Hochberg (BH) method.

71

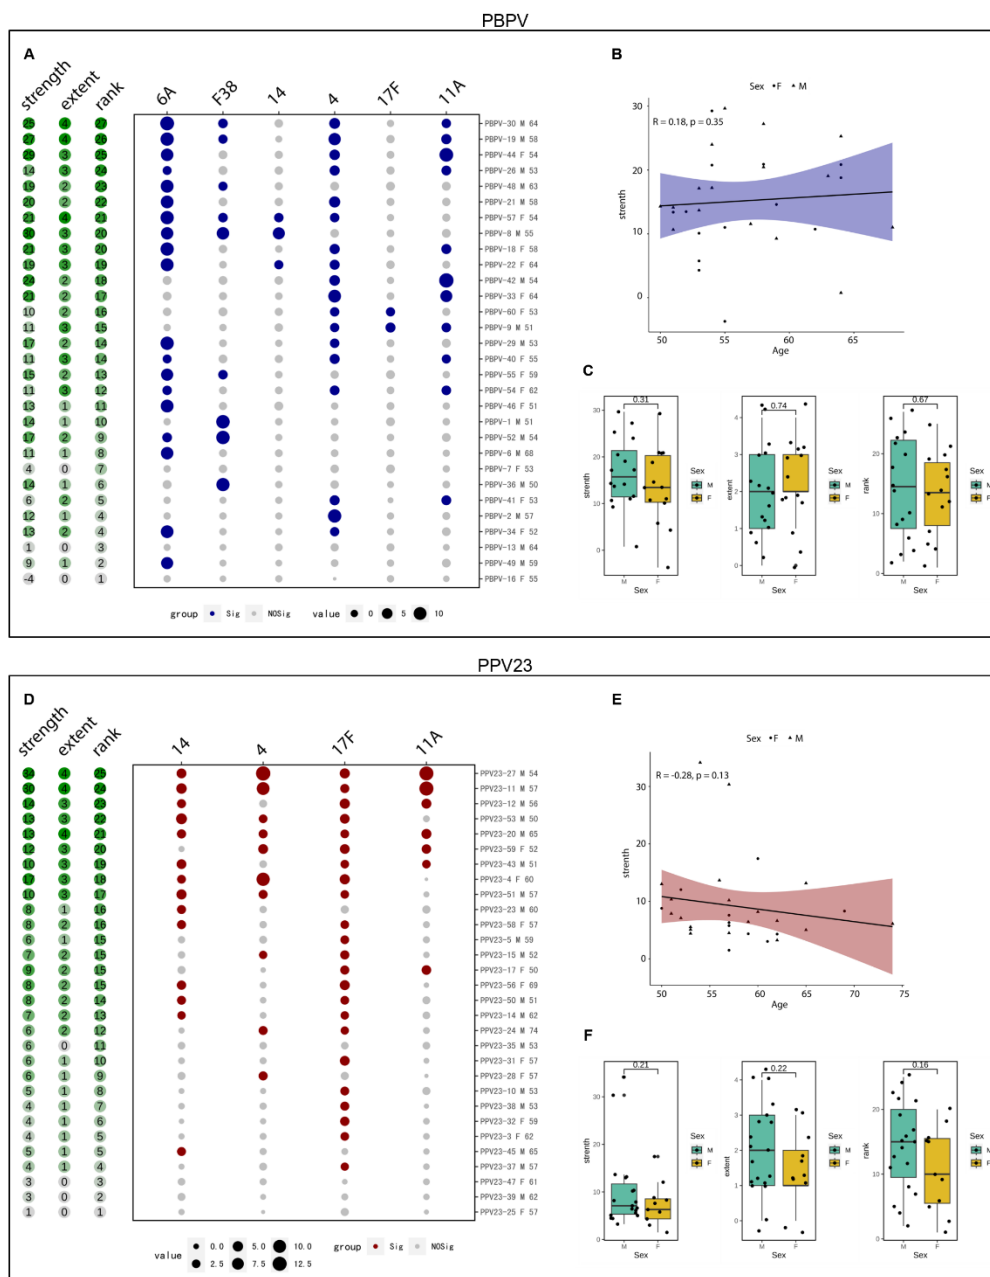

72

73 **Supplemental Figure 4 Comparative analysis of OPA induced by PBPV**  
74 **and PPV23 at day 90 post-vaccination. (A and D)** The OPA elicited by PBPV  
75 and PPV23 at D90 were presented. The left panel illustrates the strength  
76 ( $\log_2(\text{sum fold change})$ ), extent, and rank of OPA reactions (strength means the  
77 sum of fold change values between baseline and D90 for all serotypes; extent  
78 means the number of serotypes (of 4) to which the donor elicits marked (that is,  
79 an OPA titer of  $\geq 2$ ) responses; rank means an individual's vaccine  
80 responsiveness in the cohort based on aggregate responses for all serotypes,  
81 where higher ranks represent stronger responses. The middle bubble plot uses  
82 color coding to indicate marked responses ( $\text{Log}_2 \text{ fold change [FC]} > 1$ ): blue/red  
83 denotes a marked enhancement of OPA functionality ( $\text{D90/D0 OPA value} \geq 2$ ),  
84 while gray indicates a value  $\leq 2$ . Bubble size represents the magnitude of the  
85 response. The right panel provides information on participant ID, gender (F for  
86 female, M for male), and age. **(B and E)** Correlation between OPA response  
87 intensity and age at D90 with PBPV and PPV23. **(C and F)** Gender-based  
88 differences in OPA response intensity, magnitude, and grade at D90 with PBPV  
89 and PPV23. Boxplots display the median and interquartile range (IQR, 25–75%),  
90 with whiskers indicating values within  $1.5 \times \text{IQR}$  above and below the  
91 quartiles.

92

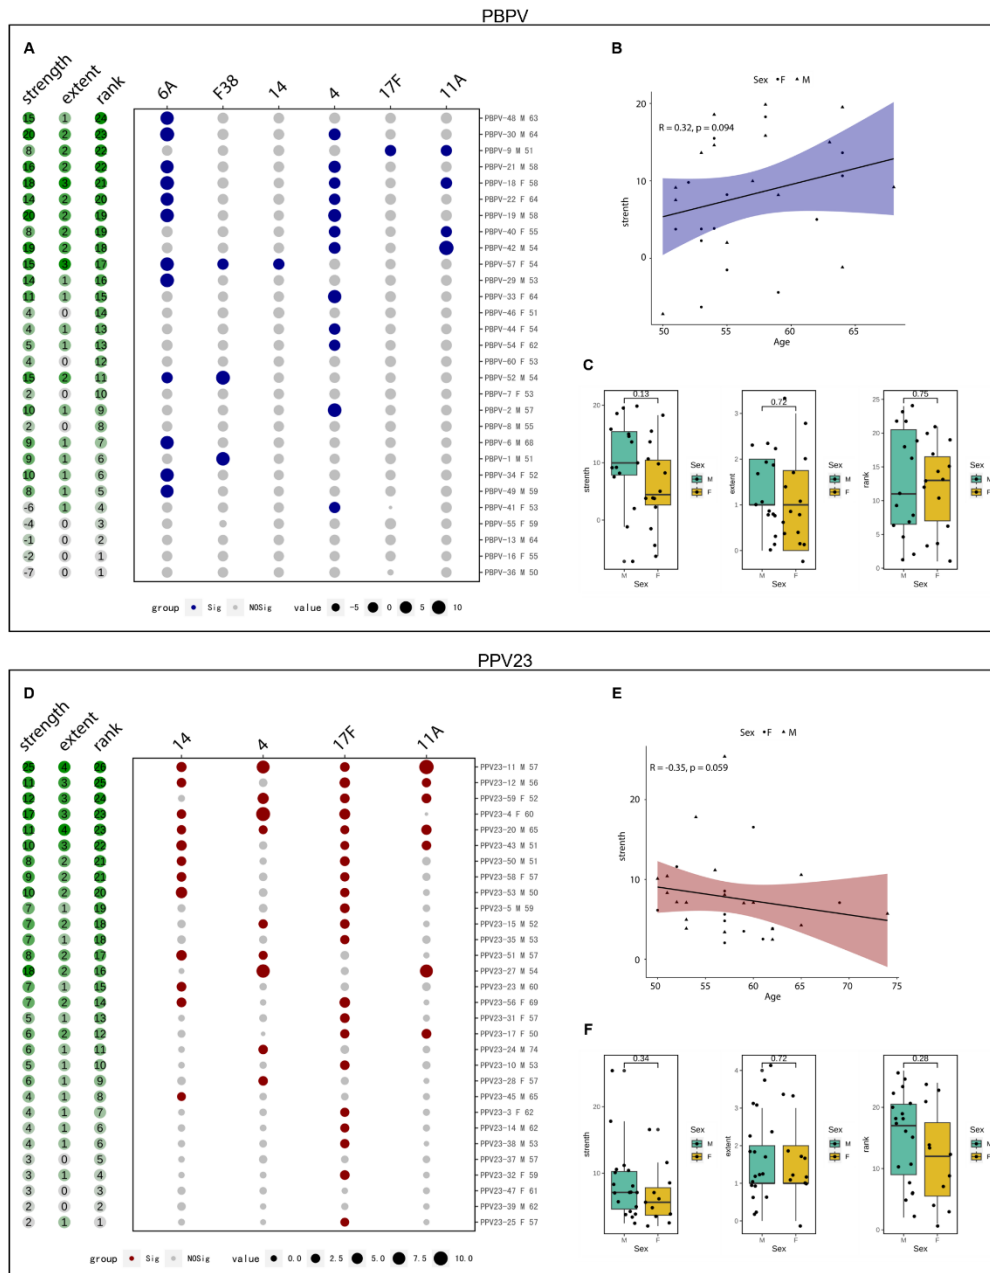

93

94 **Supplemental Figure 5 Comparative analysis of OPA induced by PBPV**  
 95 **and PPV23 at day 180 post-vaccination. (A and D) The OPA elicited by PBPV**  
 96 **and PPV23 at D180 were presented. The left panel illustrates the strength**  
 97 **(log<sub>2</sub>(sum fold change)), extent, and rank of OPA reactions (strength means the**  
 98 **sum of fold change values between baseline and D180 for all serotypes; extent**  
 99 **means the number of serotypes (of 4) to which the donor elicits marked (that is,**

100 an OPA titer of  $\geq 2$ ) responses; rank means an individual's vaccine  
101 responsiveness in the cohort based on aggregate responses for all serotypes,  
102 where higher ranks represent stronger responses. The middle bubble plot uses  
103 color coding to indicate marked responses (Log2 fold change [FC]  $> 1$ ): blue/red  
104 denotes a marked enhancement of OPA functionality (D180/D0 OPA value  $\geq 2$ ),  
105 while gray indicates a value  $\leq 2$ . Bubble size represents the magnitude of the  
106 response. The right panel provides information on participant ID, gender (F for  
107 female, M for male), and age. **(B and E)** Correlation between OPA response  
108 intensity and age at D180 with PBPV and PPV23. **(C and F)** Gender-based  
109 differences in OPA response intensity, magnitude, and grade at D180 with  
110 PBPV and PPV23. Boxplots display the median and interquartile range (IQR,  
111 25–75%), with whiskers indicating values within  $1.5 \times$  IQR above and below  
112 the quartiles.

113

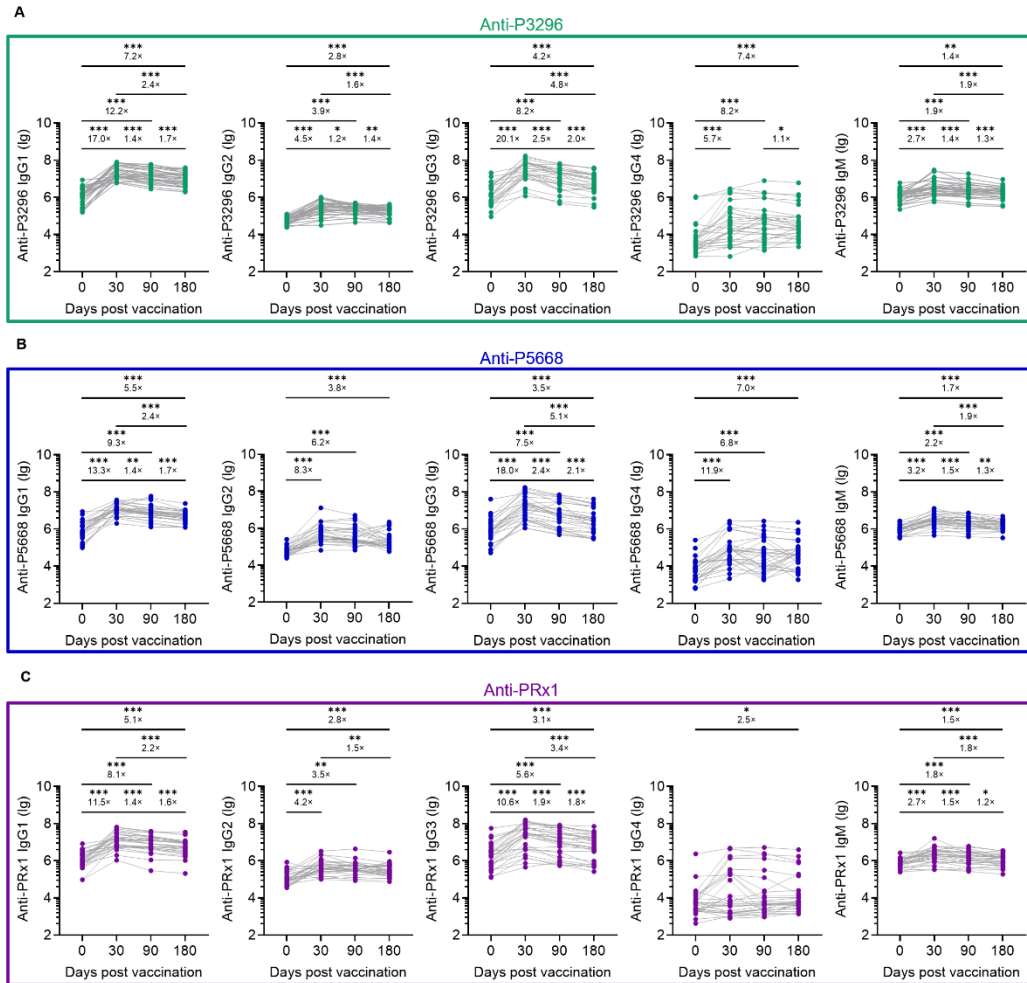

114

115 **Supplemental Figure 6 Kinetics of P3296-, P5668-, and PRx1-specific**

116 **antibody subclass titers from day 30 to 180 post-vaccination. (A-C) Titers**

117 **of antibody subclasses (IgG1, IgG2, IgG3, IgG4, and IgM) induced against**

118 **P3296, P5668 and PRx1 in vaccinated subjects. Significance was measured**

119 **using the Wilcoxon rank-sum test in A-C. All p-values were adjusted for multiple**

120 **testing using the Benjamini–Hochberg (BH) method. \*p < 0.05, \*\*p < 0.01, \*\*\*p**

121 **< 0.001.**

122

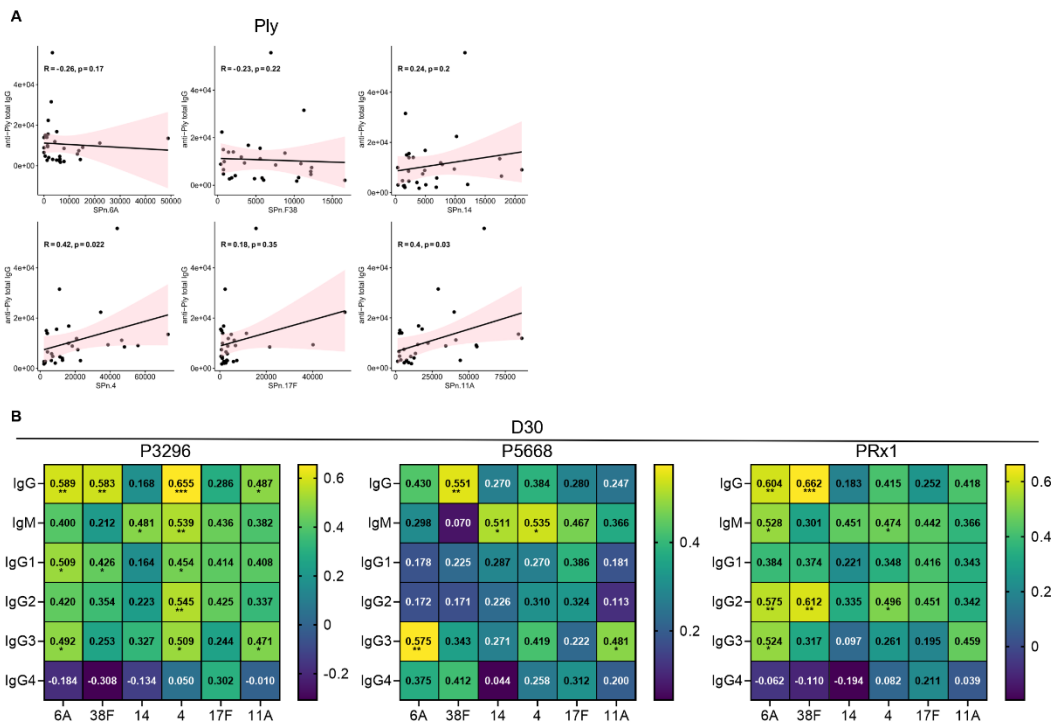

123

124 **Supplemental Figure 7 Correlation between antibody titers and OPA**

125 **indices induced by PBPV. (A)** The correlation between Ply-specific antibody

126 titers and the OPA indices of the six serotypes at D30. **(B)** The correlation

127 between the titers of antibody subclasses (IgG, IgM, IgG1, IgG2, IgG3 and IgG4)

128 of three immunogens and the OPA indices for six serotypes at D30. Significance

129 was measured using the Spearman correlation analysis in **A** and **B**. All p-values

130 were adjusted for multiple testing using the Benjamini–Hochberg (BH) method.

131 \*p < 0.05, \*\*p < 0.01, \*\*\*p < 0.001.

132

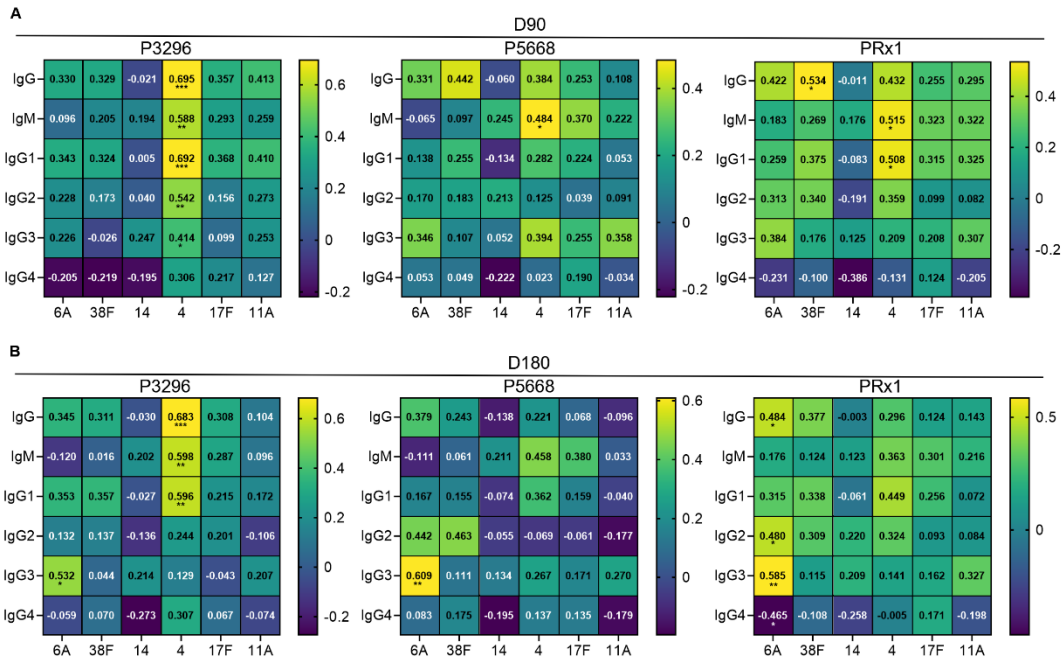

133

134 **Supplemental Figure 8 Correlation between antibody titers and OPA**

135 **indices at day 90 and 180 post-vaccination induced by PBPV. (A and B)**

136 The correlation between the titers of antibody subclasses of three PspA proteins

137 and the OPA indices for six serotypes at D90 and D180. Significance was

138 measured using the Spearman correlation analysis in **A** and **B**. All p-values

139 were adjusted for multiple testing using the Benjamini–Hochberg (BH) method.

140 \*p < 0.05, \*\*p < 0.01, \*\*\*p < 0.001.

141

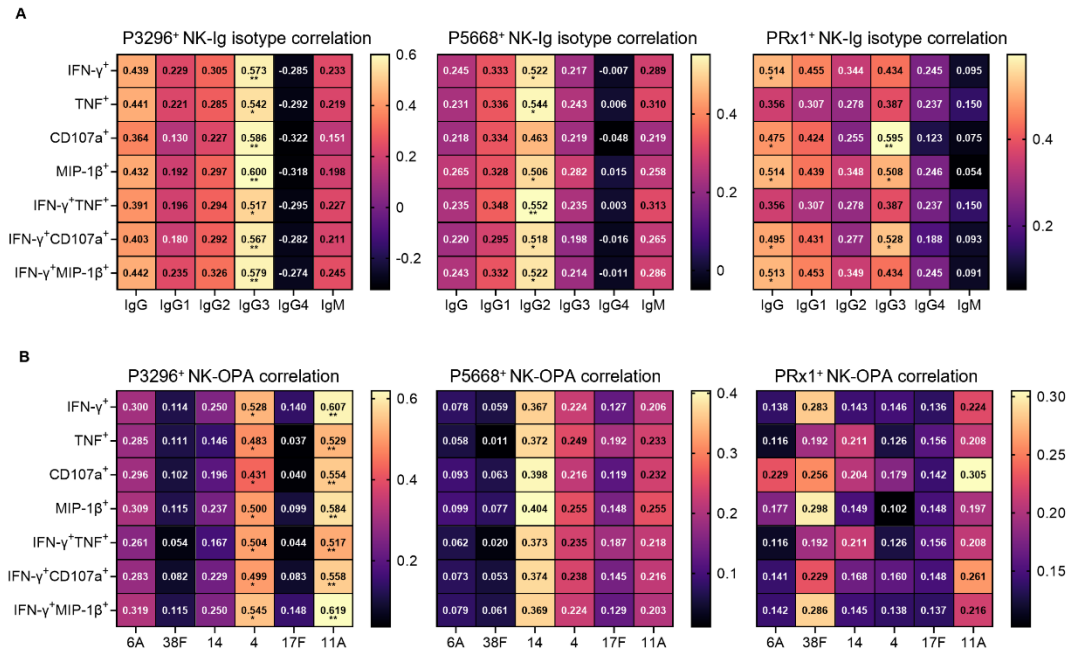

142

143 **Supplemental Figure 9 Functional NK cell responses induced by PBPV.**

144 **(A)** Correlation analysis between the positive rate of cytokines secreted by NK

145 cells activated by P3296, P5668, and PRx1-specific antibodies and the titers of

146 corresponding different antibody subclasses. **(B)** Correlation analysis between

147 the positive rate of cytokines secreted by NK cells activated by P3296, P5668,

148 and PRx1-specific antibodies and the OPA indices of 6 serotypes. Significance

149 was measured using the Spearman correlation analysis in **A** and **B**. All p-values

150 were adjusted for multiple testing using the Benjamini–Hochberg (BH) method.

151 \*p < 0.05, \*\*p < 0.01, \*\*\*p < 0.001.
